# Supplementary material
Source: HighWire-hosted journal article supplement (https://jme.bmj.com/highwire/filestream/153535/field_highwire_adjunct_files/0/jme-2023-109808supp001_data_supplement.pdf)
Supplement: jme-2023-109808supp001_data_supplement.pdf [file jme-2023-109808supp001_data_supplement.pdf]

**Appendix: test results (ANOVA + Tukey)**

Tests performed in SPSS in December 2023

|                 |        |                | <b>ANOVA 1</b> |     |             |       |             |
|-----------------|--------|----------------|----------------|-----|-------------|-------|-------------|
| Formulation_cat |        |                | Sum of Squares | df  | Mean Square | F     | Sig.        |
| Reproduce       | Mary   | Between Groups | ,734           | 2   | ,367        | 1,341 | <b>,265</b> |
|                 |        | Within Groups  | 39,698         | 145 | ,274        |       |             |
|                 |        | Total          | 40,432         | 147 |             |       |             |
|                 | Marc   | Between Groups | 1,247          | 2   | ,623        | ,524  | <b>,593</b> |
|                 |        | Within Groups  | 172,510        | 145 | 1,190       |       |             |
|                 |        | Total          | 173,757        | 147 |             |       |             |
|                 | Donor  | Between Groups | ,844           | 2   | ,422        | ,799  | <b>,452</b> |
|                 |        | Within Groups  | 76,581         | 145 | ,528        |       |             |
|                 |        | Total          | 77,426         | 147 |             |       |             |
|                 | Doctor | Between Groups | 3,979          | 2   | 1,990       | 1,296 | <b>,277</b> |
|                 |        | Within Groups  | 222,582        | 145 | 1,535       |       |             |
|                 |        | Total          | 226,561        | 147 |             |       |             |
| Parent          | Mary   | Between Groups | ,032           | 2   | ,016        | ,064  | <b>,938</b> |
|                 |        | Within Groups  | 35,779         | 145 | ,247        |       |             |

|       |        |                |         |     |        |        |                 |
|-------|--------|----------------|---------|-----|--------|--------|-----------------|
|       |        | Total          | 35,811  | 147 |        |        |                 |
|       | Marc   | Between Groups | 14,947  | 2   | 7,474  | 4,439  | <b>,013</b>     |
|       |        | Within Groups  | 244,100 | 145 | 1,683  |        |                 |
|       |        | Total          | 259,047 | 147 |        |        |                 |
|       | Donor  | Between Groups | 20,007  | 2   | 10,004 | 5,958  | <b>,003</b>     |
|       |        | Within Groups  | 243,473 | 145 | 1,679  |        |                 |
|       |        | Total          | 263,480 | 147 |        |        |                 |
|       | Doctor | Between Groups | ,194    | 2   | ,097   | ,691   | <b>,503</b>     |
|       |        | Within Groups  | 20,367  | 145 | ,140   |        |                 |
|       |        | Total          | 20,561  | 147 |        |        |                 |
| Child | Mary   | Between Groups | ,338    | 2   | ,169   | 1,055  | <b>,351</b>     |
|       |        | Within Groups  | 23,873  | 149 | ,160   |        |                 |
|       |        | Total          | 24,211  | 151 |        |        |                 |
|       | Marc   | Between Groups | 25,580  | 2   | 12,790 | 7,339  | <b>&lt;,001</b> |
|       |        | Within Groups  | 259,683 | 149 | 1,743  |        |                 |
|       |        | Total          | 285,263 | 151 |        |        |                 |
|       | Donor  | Between Groups | 41,075  | 2   | 20,537 | 14,515 | <b>&lt;,001</b> |
|       |        | Within Groups  | 210,820 | 149 | 1,415  |        |                 |
|       |        | Total          | 251,895 | 151 |        |        |                 |

|        |                |        |     |      |      |             |
|--------|----------------|--------|-----|------|------|-------------|
| Doctor | Between Groups | ,482   | 2   | ,241 | ,986 | <b>,375</b> |
|        | Within Groups  | 36,406 | 149 | ,244 |      |             |
|        | Total          | 36,888 | 151 |      |      |             |

### Multiple Comparisons 1

#### Tukey HSD

| Formulation<br>Cat | Dependent<br>Var. | (I) Genetic_cat | (J) Genetic_cat | Mean<br>Difference<br>(I-J) | Std. Error  | Sig.        | 95% Confidence<br>Interval |                |
|--------------------|-------------------|-----------------|-----------------|-----------------------------|-------------|-------------|----------------------------|----------------|
|                    |                   |                 |                 |                             |             |             | Lower<br>Bound             | Upper<br>Bound |
| Reproduce          | Mary              | Unrelated       | Brother         | -,14286                     | ,10571      | <b>,369</b> | -,3932                     | ,1075          |
|                    |                   |                 | Twin            | ,01265                      | ,10518      | <b>,992</b> | -,2364                     | ,2617          |
|                    |                   | Brother         | Unrelated       | ,14286                      | ,10571      | <b>,369</b> | -,1075                     | ,3932          |
|                    |                   |                 | Twin            | ,15551                      | ,10518      | <b>,304</b> | -,0936                     | ,4046          |
|                    |                   | Twin            | Unrelated       | -,01265                     | ,10518      | <b>,992</b> | -,2617                     | ,2364          |
|                    |                   |                 | Brother         | -,15551                     | ,10518      | <b>,304</b> | -,4046                     | ,0936          |
|                    | Marc              | Unrelated       | Brother         | ,14286                      | ,22036      | <b>,794</b> | -,3790                     | ,6647          |
|                    |                   |                 | Twin            | ,22163                      | ,21926      | <b>,571</b> | -,2976                     | ,7408          |
|                    |                   | Brother         | Unrelated       | -,14286                     | ,22036      | <b>,794</b> | -,6647                     | ,3790          |
|                    |                   |                 | Twin            | ,07878                      | ,21926      | <b>,931</b> | -,4404                     | ,5980          |
|                    |                   | Twin            | Unrelated       | -,22163                     | ,21926      | <b>,571</b> | -,7408                     | ,2976          |
|                    |                   |                 | Brother         | -,07878                     | ,21926      | <b>,931</b> | -,5980                     | ,4404          |
| Donor              | Unrelated         | Brother         | -,18367         | ,14682                      | <b>,425</b> | -,5314      | ,1640                      |                |
|                    |                   | Twin            | -,11510         | ,14609                      | <b>,711</b> | -,4610      | ,2308                      |                |
|                    | Brother           | Unrelated       | ,18367          | ,14682                      | <b>,425</b> | -,1640      | ,5314                      |                |

|        |         |           |          |         |             |             |         |        |
|--------|---------|-----------|----------|---------|-------------|-------------|---------|--------|
|        |         | Twin      | ,06857   | ,14609  | <b>,886</b> | -,2774      | ,4145   |        |
|        | Twin    | Unrelated | ,11510   | ,14609  | <b>,711</b> | -,2308      | ,4610   |        |
|        |         | Brother   | -,06857  | ,14609  | <b>,886</b> | -,4145      | ,2774   |        |
|        | Doctor  | Unrelated | Brother  | -,04082 | ,25031      | <b>,985</b> | -,6336  | ,5519  |
|        |         | Twin      | ,32449   | ,24905  | <b>,396</b> | -,2653      | ,9143   |        |
|        | Brother | Unrelated | ,04082   | ,25031  | <b>,985</b> | -,5519      | ,6336   |        |
|        |         | Twin      | ,36531   | ,24905  | <b>,310</b> | -,2245      | ,9551   |        |
|        | Twin    | Unrelated | -,32449  | ,24905  | <b>,396</b> | -,9143      | ,2653   |        |
|        |         | Brother   | -,36531  | ,24905  | <b>,310</b> | -,9551      | ,2245   |        |
| Parent | Mary    | Unrelated | Brother  | ,02000  | ,09935      | <b>,978</b> | -,2153  | ,2553  |
|        |         | Twin      | -,01583  | ,10038  | <b>,986</b> | -,2535      | ,2219   |        |
|        | Brother | Unrelated | -,02000  | ,09935  | <b>,978</b> | -,2553      | ,2153   |        |
|        |         | Twin      | -,03583  | ,10038  | <b>,932</b> | -,2735      | ,2019   |        |
|        | Twin    | Unrelated | ,01583   | ,10038  | <b>,986</b> | -,2219      | ,2535   |        |
|        |         | Brother   | ,03583   | ,10038  | <b>,932</b> | -,2019      | ,2735   |        |
|        | Marc    | Unrelated | Brother  | ,42000  | ,25950      | <b>,241</b> | -,1945  | 1,0345 |
|        |         | Twin      | ,78000*  | ,26218  | <b>,010</b> | ,1591       | 1,4009  |        |
|        | Brother | Unrelated | -,42000  | ,25950  | <b>,241</b> | -1,0345     | ,1945   |        |
|        |         | Twin      | ,36000   | ,26218  | <b>,358</b> | -,2609      | ,9809   |        |
|        | Twin    | Unrelated | -,78000* | ,26218  | <b>,010</b> | -1,4009     | -,1591  |        |
|        |         | Brother   | -,36000  | ,26218  | <b>,358</b> | -,9809      | ,2609   |        |
|        | Donor   | Unrelated | Brother  | -,56000 | ,25916      | <b>,082</b> | -1,1737 | ,0537  |
|        |         | Twin      | -,89250* | ,26185  | <b>,002</b> | -1,5126     | -,2724  |        |
|        | Brother | Unrelated | ,56000   | ,25916  | <b>,082</b> | -,0537      | 1,1737  |        |
|        |         | Twin      | -,33250  | ,26185  | <b>,415</b> | -,9526      | ,2876   |        |
|        | Twin    | Unrelated | ,89250*  | ,26185  | <b>,002</b> | ,2724       | 1,5126  |        |

|       |        |           |           |           |           |             |                 |         |        |
|-------|--------|-----------|-----------|-----------|-----------|-------------|-----------------|---------|--------|
|       |        |           | Brother   | ,33250    | ,26185    | <b>,415</b> | -,2876          | ,9526   |        |
|       | Doctor | Unrelated | Brother   | ,06000    | ,07496    | <b>,703</b> | -,1175          | ,2375   |        |
|       |        |           | Twin      | -,02667   | ,07573    | <b>,934</b> | -,2060          | ,1527   |        |
|       |        |           | Brother   | Unrelated | -,06000   | ,07496      | <b>,703</b>     | -,2375  | ,1175  |
|       |        |           |           | Twin      | -,08667   | ,07573      | <b>,488</b>     | -,2660  | ,0927  |
|       |        |           | Twin      | Unrelated | ,02667    | ,07573      | <b>,934</b>     | -,1527  | ,2060  |
|       |        |           |           | Brother   | ,08667    | ,07573      | <b>,488</b>     | -,0927  | ,2660  |
| Child | Mary   | Unrelated | Brother   | -,05686   | ,07966    | <b>,756</b> | -,2455          | ,1317   |        |
|       |        |           |           | Twin      | ,05882    | ,07927      | <b>,739</b>     | -,1288  | ,2465  |
|       |        |           | Brother   | Unrelated | ,05686    | ,07966      | <b>,756</b>     | -,1317  | ,2455  |
|       |        |           |           | Twin      | ,11569    | ,07966      | <b>,317</b>     | -,0729  | ,3043  |
|       |        |           | Twin      | Unrelated | -,05882   | ,07927      | <b>,739</b>     | -,2465  | ,1288  |
|       |        |           |           | Brother   | -,11569   | ,07966      | <b>,317</b>     | -,3043  | ,0729  |
|       |        | Marc      | Unrelated | Brother   | ,92275*   | ,26274      | <b>,002</b>     | ,3008   | 1,5447 |
|       |        |           |           | Twin      | ,80392*   | ,26143      | <b>,007</b>     | ,1850   | 1,4228 |
|       |        |           | Brother   | Unrelated | -,92275*  | ,26274      | <b>,002</b>     | -1,5447 | -,3008 |
|       |        |           |           | Twin      | -,11882   | ,26274      | <b>,893</b>     | -,7408  | ,5032  |
|       |        |           | Twin      | Unrelated | -,80392*  | ,26143      | <b>,007</b>     | -1,4228 | -,1850 |
|       |        |           |           | Brother   | ,11882    | ,26274      | <b>,893</b>     | -,5032  | ,7408  |
|       |        | Donor     | Unrelated | Brother   | -1,23647* | ,23673      | <b>&lt;,001</b> | -1,7969 | -,6760 |
|       |        |           |           | Twin      | -,88235*  | ,23556      | <b>&lt;,001</b> | -1,4400 | -,3247 |
|       |        |           | Brother   | Unrelated | 1,23647*  | ,23673      | <b>&lt;,001</b> | ,6760   | 1,7969 |
|       |        |           |           | Twin      | ,35412    | ,23673      | <b>,296</b>     | -,2063  | ,9145  |
|       |        |           | Twin      | Unrelated | ,88235*   | ,23556      | <b>&lt;,001</b> | ,3247   | 1,4400 |
|       |        |           |           | Brother   | -,35412   | ,23673      | <b>,296</b>     | -,9145  | ,2063  |
|       | Doctor | Unrelated | Brother   | -,06196   | ,09838    | <b>,804</b> | -,2949          | ,1709   |        |

|         |           |         |        |             |        |       |
|---------|-----------|---------|--------|-------------|--------|-------|
|         | Twin      | -,13725 | ,09789 | <b>,342</b> | -,3690 | ,0945 |
| Brother | Unrelated | ,06196  | ,09838 | <b>,804</b> | -,1709 | ,2949 |
|         | Twin      | -,07529 | ,09838 | <b>,725</b> | -,3082 | ,1576 |
| Twin    | Unrelated | ,13725  | ,09789 | <b>,342</b> | -,0945 | ,3690 |
|         | Brother   | ,07529  | ,09838 | <b>,725</b> | -,1576 | ,3082 |

## ANOVA 2

| Genetic_cat |        |                | Sum of Squares | df  | Mean Square | F      | Sig.            |
|-------------|--------|----------------|----------------|-----|-------------|--------|-----------------|
| Unrelated   | Mary   | Between Groups | 1,760          | 2   | ,880        | 3,873  | <b>,023</b>     |
|             |        | Within Groups  | 33,413         | 147 | ,227        |        |                 |
|             |        | Total          | 35,173         | 149 |             |        |                 |
|             | Marc   | Between Groups | 134,747        | 2   | 67,374      | 47,663 | <b>&lt;,001</b> |
|             |        | Within Groups  | 207,793        | 147 | 1,414       |        |                 |
|             |        | Total          | 342,540        | 149 |             |        |                 |
|             | Donor  | Between Groups | 90,820         | 2   | 45,410      | 34,649 | <b>&lt;,001</b> |
|             |        | Within Groups  | 192,653        | 147 | 1,311       |        |                 |
|             |        | Total          | 283,473        | 149 |             |        |                 |
|             | Doctor | Between Groups | 40,380         | 2   | 20,190      | 36,613 | <b>&lt;,001</b> |
|             |        | Within Groups  | 81,060         | 147 | ,551        |        |                 |
|             |        | Total          | 121,440        | 149 |             |        |                 |
| Brother     | Mary   | Between Groups | ,399           | 2   | ,200        | ,881   | <b>,416</b>     |
|             |        | Within Groups  | 33,051         | 146 | ,226        |        |                 |
|             |        | Total          | 33,450         | 148 |             |        |                 |
|             | Marc   | Between Groups | 91,377         | 2   | 45,689      | 29,301 | <b>&lt;,001</b> |

|      |        |                |         |     |        |        |                 |
|------|--------|----------------|---------|-----|--------|--------|-----------------|
|      |        | Within Groups  | 227,656 | 146 | 1,559  |        |                 |
|      |        | Total          | 319,034 | 148 |        |        |                 |
|      | Donor  | Between Groups | 56,307  | 2   | 28,154 | 27,811 | <b>&lt;,001</b> |
|      |        | Within Groups  | 147,800 | 146 | 1,012  |        |                 |
|      |        | Total          | 204,107 | 148 |        |        |                 |
|      | Doctor | Between Groups | 43,297  | 2   | 21,649 | 31,002 | <b>&lt;,001</b> |
|      |        | Within Groups  | 101,951 | 146 | ,698   |        |                 |
|      |        | Total          | 145,248 | 148 |        |        |                 |
| Twin | Mary   | Between Groups | 1,892   | 2   | ,946   | 4,200  | <b>,017</b>     |
|      |        | Within Groups  | 32,887  | 146 | ,225   |        |                 |
|      |        | Total          | 34,779  | 148 |        |        |                 |
|      | Marc   | Between Groups | 71,116  | 2   | 35,558 | 21,555 | <b>&lt;,001</b> |
|      |        | Within Groups  | 240,844 | 146 | 1,650  |        |                 |
|      |        | Total          | 311,960 | 148 |        |        |                 |
|      | Donor  | Between Groups | 27,539  | 2   | 13,769 | 10,557 | <b>&lt;,001</b> |
|      |        | Within Groups  | 190,421 | 146 | 1,304  |        |                 |
|      |        | Total          | 217,960 | 148 |        |        |                 |
|      | Doctor | Between Groups | 16,301  | 2   | 8,151  | 12,352 | <b>&lt;,001</b> |
|      |        | Within Groups  | 96,343  | 146 | ,660   |        |                 |
|      |        | Total          | 112,644 | 148 |        |        |                 |

## Multiple Comparisons 2

Tukey HSD

| Genetic_cat | Dependent Variable | (I) Formulation_cat | (J) Formulation_cat | Mean Difference (I-J) | Std. Error      | Sig.            | 95% Confidence Interval |             |
|-------------|--------------------|---------------------|---------------------|-----------------------|-----------------|-----------------|-------------------------|-------------|
|             |                    |                     |                     |                       |                 |                 | Lower Bound             | Upper Bound |
| Unrelated   | Mary               | Reproduce           | Parent              | -,24735*              | ,09584          | <b>,029</b>     | -,4743                  | -,0204      |
|             |                    |                     | Child               | -,21048               | ,09537          | <b>,073</b>     | -,4363                  | ,0153       |
|             |                    | Parent              | Reproduce           | ,24735*               | ,09584          | <b>,029</b>     | ,0204                   | ,4743       |
|             |                    |                     | Child               | ,03686                | ,09488          | <b>,920</b>     | -,1878                  | ,2615       |
|             |                    | Child               | Reproduce           | ,21048                | ,09537          | <b>,073</b>     | -,0153                  | ,4363       |
|             |                    |                     | Parent              | -,03686               | ,09488          | <b>,920</b>     | -,2615                  | ,1878       |
|             | Marc               | Reproduce           | Parent              | -2,19837*             | ,23900          | <b>&lt;,001</b> | -2,7642                 | -1,6325     |
|             |                    |                     | Child               | -1,78111*             | ,23783          | <b>&lt;,001</b> | -2,3442                 | -1,2180     |
|             |                    | Parent              | Reproduce           | 2,19837*              | ,23900          | <b>&lt;,001</b> | 1,6325                  | 2,7642      |
|             |                    |                     | Child               | ,41725                | ,23662          | <b>,186</b>     | -,1430                  | ,9775       |
|             |                    | Child               | Reproduce           | 1,78111*              | ,23783          | <b>&lt;,001</b> | 1,2180                  | 2,3442      |
|             |                    |                     | Parent              | -,41725               | ,23662          | <b>,186</b>     | -,9775                  | ,1430       |
| Donor       | Reproduce          | Parent              | 1,82490*            | ,23012                | <b>&lt;,001</b> | 1,2800          | 2,3698                  |             |
|             |                    | Child               | 1,42137*            | ,22901                | <b>&lt;,001</b> | ,8792           | 1,9636                  |             |
|             | Parent             | Reproduce           | -1,82490*           | ,23012                | <b>&lt;,001</b> | -2,3698         | -1,2800                 |             |
|             |                    | Child               | -,40353             | ,22783                | <b>,183</b>     | -,9430          | ,1359                   |             |
|             | Child              | Reproduce           | -1,42137*           | ,22901                | <b>&lt;,001</b> | -1,9636         | -,8792                  |             |
|             |                    | Parent              | ,40353              | ,22783                | <b>,183</b>     | -,1359          | ,9430                   |             |
| Doctor      | Reproduce          | Parent              | 1,08449*            | ,14927                | <b>&lt;,001</b> | ,7311           | 1,4379                  |             |
|             |                    | Child               | 1,12645*            | ,14855                | <b>&lt;,001</b> | ,7747           | 1,4782                  |             |
|             | Parent             | Reproduce           | -1,08449*           | ,14927                | <b>&lt;,001</b> | -1,4379         | -,7311                  |             |
|             |                    | Child               | ,04196              | ,14779                | <b>,957</b>     | -,3080          | ,3919                   |             |
|             | Child              | Reproduce           | -1,12645*           | ,14855                | <b>&lt;,001</b> | -1,4782         | -,7747                  |             |
|             |                    | Parent              | -,04196             | ,14779                | <b>,957</b>     | -,3919          | ,3080                   |             |



|         |           |           |           |           |                 |                 |         |         |
|---------|-----------|-----------|-----------|-----------|-----------------|-----------------|---------|---------|
| Brother | Mary      | Reproduce | Parent    | -,08449   | ,09564          | <b>,652</b>     | -,3110  | ,1420   |
|         |           |           | Child     | -,12449   | ,09564          | <b>,397</b>     | -,3510  | ,1020   |
|         |           | Parent    | Reproduce | ,08449    | ,09564          | <b>,652</b>     | -,1420  | ,3110   |
|         |           |           | Child     | -,04000   | ,09516          | <b>,907</b>     | -,2653  | ,1853   |
|         |           | Child     | Reproduce | ,12449    | ,09564          | <b>,397</b>     | -,1020  | ,3510   |
|         |           |           | Parent    | ,04000    | ,09516          | <b>,907</b>     | -,1853  | ,2653   |
|         | Marc      | Reproduce | Parent    | -1,92122* | ,25101          | <b>&lt;,001</b> | -2,5156 | -1,3269 |
|         |           |           | Child     | -1,00122* | ,25101          | <b>&lt;,001</b> | -1,5956 | -,4069  |
|         |           | Parent    | Reproduce | 1,92122*  | ,25101          | <b>&lt;,001</b> | 1,3269  | 2,5156  |
|         |           |           | Child     | ,92000*   | ,24974          | <b>&lt;,001</b> | ,3286   | 1,5114  |
|         |           | Child     | Reproduce | 1,00122*  | ,25101          | <b>&lt;,001</b> | ,4069   | 1,5956  |
|         |           |           | Parent    | -,92000*  | ,24974          | <b>&lt;,001</b> | -1,5114 | -,3286  |
|         | Donor     | Reproduce | Parent    | 1,44857*  | ,20225          | <b>&lt;,001</b> | ,9697   | 1,9275  |
|         |           |           | Child     | ,36857    | ,20225          | <b>,166</b>     | -,1103  | ,8475   |
|         |           | Parent    | Reproduce | -1,44857* | ,20225          | <b>&lt;,001</b> | -1,9275 | -,9697  |
|         |           |           | Child     | -1,08000* | ,20123          | <b>&lt;,001</b> | -1,5565 | -,6035  |
|         |           | Child     | Reproduce | -,36857   | ,20225          | <b>,166</b>     | -,8475  | ,1103   |
|         |           |           | Parent    | 1,08000*  | ,20123          | <b>&lt;,001</b> | ,6035   | 1,5565  |
| Doctor  | Reproduce | Parent    | 1,18531*  | ,16798    | <b>&lt;,001</b> | ,7876           | 1,5831  |         |
|         |           | Child     | 1,10531*  | ,16798    | <b>&lt;,001</b> | ,7076           | 1,5031  |         |
|         | Parent    | Reproduce | -1,18531* | ,16798    | <b>&lt;,001</b> | -1,5831         | -,7876  |         |
|         |           | Child     | -,08000   | ,16713    | <b>,881</b>     | -,4757          | ,3157   |         |
|         | Child     | Reproduce | -1,10531* | ,16798    | <b>&lt;,001</b> | -1,5031         | -,7076  |         |
|         |           | Parent    | ,08000    | ,16713    | <b>,881</b>     | -,3157          | ,4757   |         |
| Twin    | Mary      | Reproduce | Parent    | -,27583*  | ,09590          | <b>,013</b>     | -,5029  | -,0487  |
|         |           |           | Child     | -,16431   | ,09445          | <b>,194</b>     | -,3880  | ,0593   |

|        |           |           |           |                 |                 |         |         |
|--------|-----------|-----------|-----------|-----------------|-----------------|---------|---------|
| Marc   | Parent    | Reproduce | ,27583*   | ,09590          | <b>,013</b>     | ,0487   | ,5029   |
|        |           | Child     | ,11152    | ,09544          | <b>,474</b>     | -,1145  | ,3375   |
|        | Child     | Reproduce | ,16431    | ,09445          | <b>,194</b>     | -,0593  | ,3880   |
|        |           | Parent    | -,11152   | ,09544          | <b>,474</b>     | -,3375  | ,1145   |
|        | Reproduce | Parent    | -1,64000* | ,25954          | <b>&lt;,001</b> | -2,2545 | -1,0255 |
|        |           | Child     | -1,19882* | ,25561          | <b>&lt;,001</b> | -1,8041 | -,5936  |
|        |           | Parent    | 1,64000*  | ,25954          | <b>&lt;,001</b> | 1,0255  | 2,2545  |
|        |           | Child     | ,44118    | ,25829          | <b>,206</b>     | -,1704  | 1,0528  |
| Child  | Reproduce | 1,19882*  | ,25561    | <b>&lt;,001</b> | ,5936           | 1,8041  |         |
|        | Parent    | -,44118   | ,25829    | <b>,206</b>     | -1,0528         | ,1704   |         |
|        | Donor     | Reproduce | 1,04750*  | ,23077          | <b>&lt;,001</b> | ,5011   | 1,5939  |
|        |           | Child     | ,65412*   | ,22729          | <b>,013</b>     | ,1159   | 1,1923  |
| Parent | Reproduce | -1,04750* | ,23077    | <b>&lt;,001</b> | -1,5939         | -,5011  |         |
|        | Child     | -,39338   | ,22966    | <b>,204</b>     | -,9372          | ,1504   |         |
|        | Child     | Reproduce | -,65412*  | ,22729          | <b>,013</b>     | -1,1923 | -,1159  |
|        |           | Parent    | ,39338    | ,22966          | <b>,204</b>     | -,1504  | ,9372   |
| Doctor | Reproduce | Parent    | ,73333*   | ,16415          | <b>&lt;,001</b> | ,3446   | 1,1220  |
|        |           | Child     | ,66471*   | ,16167          | <b>&lt;,001</b> | ,2819   | 1,0475  |
|        | Parent    | Reproduce | -,73333*  | ,16415          | <b>&lt;,001</b> | -1,1220 | -,3446  |
|        |           | Child     | -,06863   | ,16336          | <b>,907</b>     | -,4554  | ,3182   |
|        | Child     | Reproduce | -,66471*  | ,16167          | <b>&lt;,001</b> | -1,0475 | -,2819  |
|        |           | Parent    | ,06863    | ,16336          | <b>,907</b>     | -,3182  | ,4554   |
